# Supplementary material
Source: PubMed Central journal article supplement (PMC6439470)
Supplement: NIHMS1508820-supplement.pdf [file NIHMS1508820-supplement.pdf]

Supplementary Figure

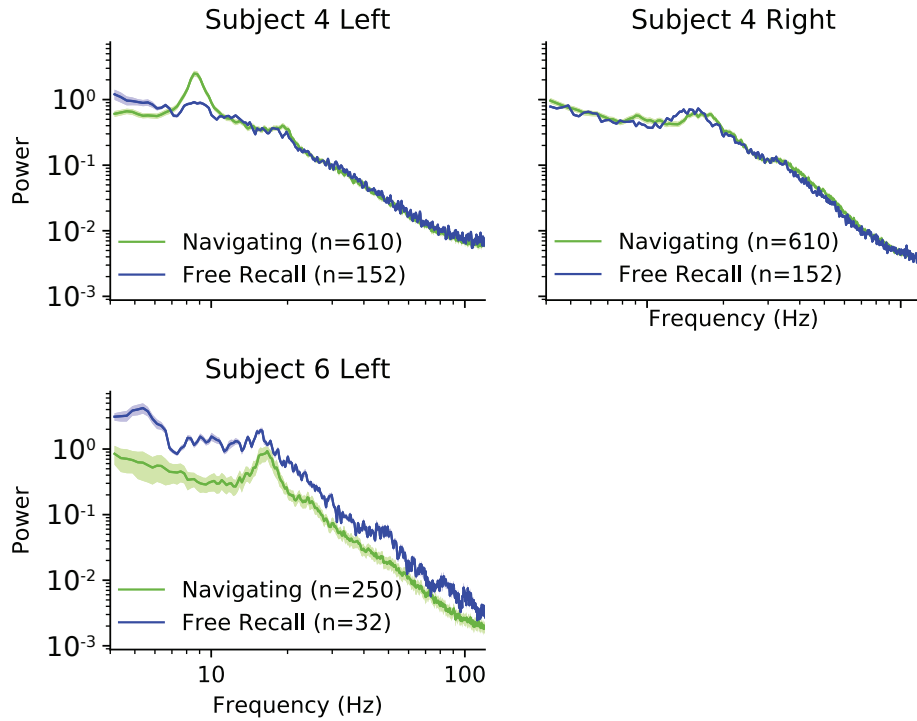

Figure 8: Comparison of power spectra during free recall distractor phase and navigation task. As shown in Figures 5 and 6, subjects 4 and 6 appear to have elevated power in the theta band during both conditions of the navigation task compared to the free recall task. Four seconds of ECoG data was collected from free recall task trials for each subject, centered around each response to the math distractor questions. Trials with >100ms of alignment error were excluded. Data from the navigation task was subdivided in four second segments as described in 5.7.3. The narrowband theta peak appears in both subjects in navigation data, but is not as prominent in the free recall task.
